# Supplementary material for: Structure–Activity Relationship Study of Xanthoxyline and Related Small Methyl Ketone Herbicides
Source: PubMed Central journal article supplement — ACS Omega. 2022 Aug 11;7(33):29002–12. doi: 10.1021/acsomega.2c02704 (PMC9404509; doi:10.1021/acsomega.2c02704), 2022-08-11
Supplement: ao2c02704_si_001.pdf [file ao2c02704_si_001.pdf]

## Supporting Information

### Structure-Activity Relationship Study of Xanthoxyline and Related Small Methyl Ketone

#### Herbicides

Warot Chotpatiwetchkul,<sup>†</sup> Nawasit Chotsaeng,<sup>\*,†,‡</sup> Chamroon Laosinwattana,<sup>§</sup> Patchanee Charoenying,<sup>†</sup>

<sup>†</sup>Department of Chemistry, School of Science, King Mongkut's Institute of Technology Ladkrabang, Bangkok 10520, Thailand

<sup>‡</sup>Integrated Applied Chemistry Research Unit, School of Science, King Mongkut's Institute of Technology Ladkrabang, Bangkok 10520, Thailand

<sup>§</sup>Department of Plant Production Technology, School of Agricultural Technology, King Mongkut's Institute of Technology Ladkrabang, Bangkok 10520, Thailand

\*Corresponding Author

E-mail: [nawasit.ch@kmitl.ac.th](mailto:nawasit.ch@kmitl.ac.th)

Tel.: +66-2329-8400 (ext. 6228); Fax: +662-3298428

**Table of Contents**

|                                                                                    |    |
|------------------------------------------------------------------------------------|----|
| 1. Spectroscopic data for some synthesized compounds in Figure 2.....              | S3 |
| 2. $^1\text{H}$ NMR and $^{13}\text{C}$ NMR spectra for synthesized compounds..... | S5 |

## 1. Spectroscopic data for some synthesized compounds in Figure 2

### (*E*)-4-(4-(Dimethylamino)phenyl)but-3-en-2-one (52)

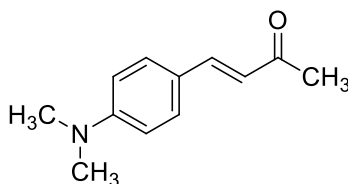

The title compound was prepared according to General Procedure from 4-(dimethylamino)benzaldehyde for a reaction time of 8 h and purified by recrystallization (MeOH) to afford an orange solid (158.5 mg, 83.75%).

m.p. 122-123 °C (MeOH);

$R_f$  = 0.46 (70% EtOAc/hexane);

IR (film) 2912, 1670 (C=O), 1587, 1524, 1358, 1256, 1184, 972, 808, 735  $\text{cm}^{-1}$ ;

$^1\text{H}$  NMR (500 MHz,  $\text{CDCl}_3$ )  $\delta$  7.48 – 7.42 (3H, m,  $\text{CH}=\text{CHCO}$  and  $\text{ArH}$ ), 6.69 – 6.66 (2H, m,  $\text{ArH}$ ), 6.54 (1H, d,  $J$  = 16.1 Hz,  $\text{CH}=\text{CHCO}$ ), 3.03 (6H, s,  $\text{N}(\text{CH}_3)_2$ ), 2.34 (3H, s,  $\text{CH}_3$ ).  $^{13}\text{C}$  NMR (125.8 MHz,  $\text{CDCl}_3$ )  $\delta$  198.54 (C=O), 151.93 (C), 144.38 (CH), 130.04 (2  $\times$  CH), 122.39 (CH), 121.95 (C), 111.83 (2  $\times$  CH), 40.11 (2  $\times$   $\text{CH}_3$ ), 27.14 ( $\text{CH}_3$ ) (Figure S1).

HRMS (ESI) Exact mass calcd for  $\text{C}_{12}\text{H}_{15}\text{NNaO}$  [ $\text{M}+\text{Na}$ ] $^+$ : 212.1051, found 212.1060.

### (*E*)-4-(4-hydroxy-3-methoxyphenyl)but-3-en-2-one (53)

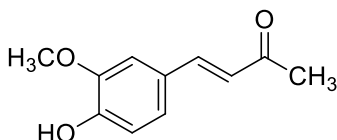

The title compound was prepared according to General Procedure from vanillin for a reaction time of 8 h and purified by recrystallization (MeOH) to afford a yellow solid (185.3 mg, 96.40%).

m.p. 120-121 °C (MeOH);

$R_f$  = 0.31 (30% EtOAc/hexane);

IR (film) 3296 (brd, OH), 3001, 1632 (C=O), 1580, 1516, 1257, 1163, 1024, 979, 823  $\text{cm}^{-1}$ ;

$^1\text{H}$  NMR (500 MHz,  $\text{CDCl}_3$ )  $\delta$  7.44 (1H, dd,  $J$  = 16.2, 2.6 Hz,  $\text{CH}=\text{CHCO}$ ), 7.07 (1H, dd,  $J$  = 8.2, 2.0 Hz,  $\text{ArH}$ ), 7.04 (1H, d,  $J$  = 1.9 Hz,  $\text{ArH}$ ), 6.92 (1H, d,  $J$  = 8.2 Hz,  $\text{ArH}$ ), 6.57 (1H, d,  $J$  = 16.2 Hz,  $\text{CH}=\text{CHCO}$ ), 6.23 (1H, s, OH), 3.91 (3H, s,  $\text{OCH}_3$ ), 2.35 (3H, s,  $\text{CH}_3$ );  $^{13}\text{C}$  NMR (125.8 MHz,  $\text{CDCl}_3$ )  $\delta$  198.58 (C=O), 148.30 (C), 146.90 (C), 143.87 (CH), 126.76 (C), 124.81 (CH), 123.46 (CH), 114.82 (CH), 109.32 (CH), 55.87 ( $\text{CH}_3$ ), 27.19 ( $\text{CH}_3$ ) (Figure S2).

HRMS (ESI) Exact mass calcd for  $\text{C}_{11}\text{H}_{12}\text{NaO}_3$  [ $\text{M}+\text{Na}$ ] $^+$ : 215.0684, found 215.0681.

**(E)-4-(4-hydroxy-3,5-dimethoxyphenyl)but-3-en-2-one (54)**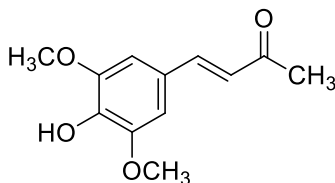

The title compound was prepared according to General Procedure from syringaldehyde for a reaction time of 6 h and purified by recrystallization (MeOH) to afford a pale-yellow solid (201.5 mg, 90.67%).

m.p. 130-131 °C (MeOH);

$R_f$  = 0.47 (60% EtOAc/hexane);

IR (film) 3342 (brd, OH), 3005, 1638 (C=O), 1585, 1514, 1458, 1260, 1101, 968, 819  $\text{cm}^{-1}$ ;

$^1\text{H}$  NMR (500 MHz,  $\text{CDCl}_3$ )  $\delta$  7.43 (1H, d,  $J$  = 16.1 Hz,  $\text{CH}=\text{CHCO}$ ), 6.79 (2H, s, ArH), 6.59 (1H, d,  $J$  = 16.1 Hz,  $\text{CH}=\text{CHCO}$ ), 5.84 (1H, s, OH), 3.92 (6H, s,  $\text{OCH}_3$ ), 2.37 (3H, s,  $\text{CH}_3$ );  $^{13}\text{C}$  NMR (125.8 MHz,  $\text{CDCl}_3$ )  $\delta$  198.27 (C=O), 147.24 (C), 143.89 (CH), 137.33 (C), 125.81 (C), 125.26 (CH), 105.19 ( $2 \times \text{CH}$ ), 56.32 ( $2 \times \text{CH}_3$ ), 27.33 ( $\text{CH}_3$ ) (Figure S3).

HRMS (ESI) Exact mass calcd for  $\text{C}_{12}\text{H}_{14}\text{NaO}_4$   $[\text{M}+\text{Na}]^+$ : 245.0790, found 245.0787.

## 2. $^1\text{H}$ NMR and $^{13}\text{C}$ NMR spectra for synthesized compounds

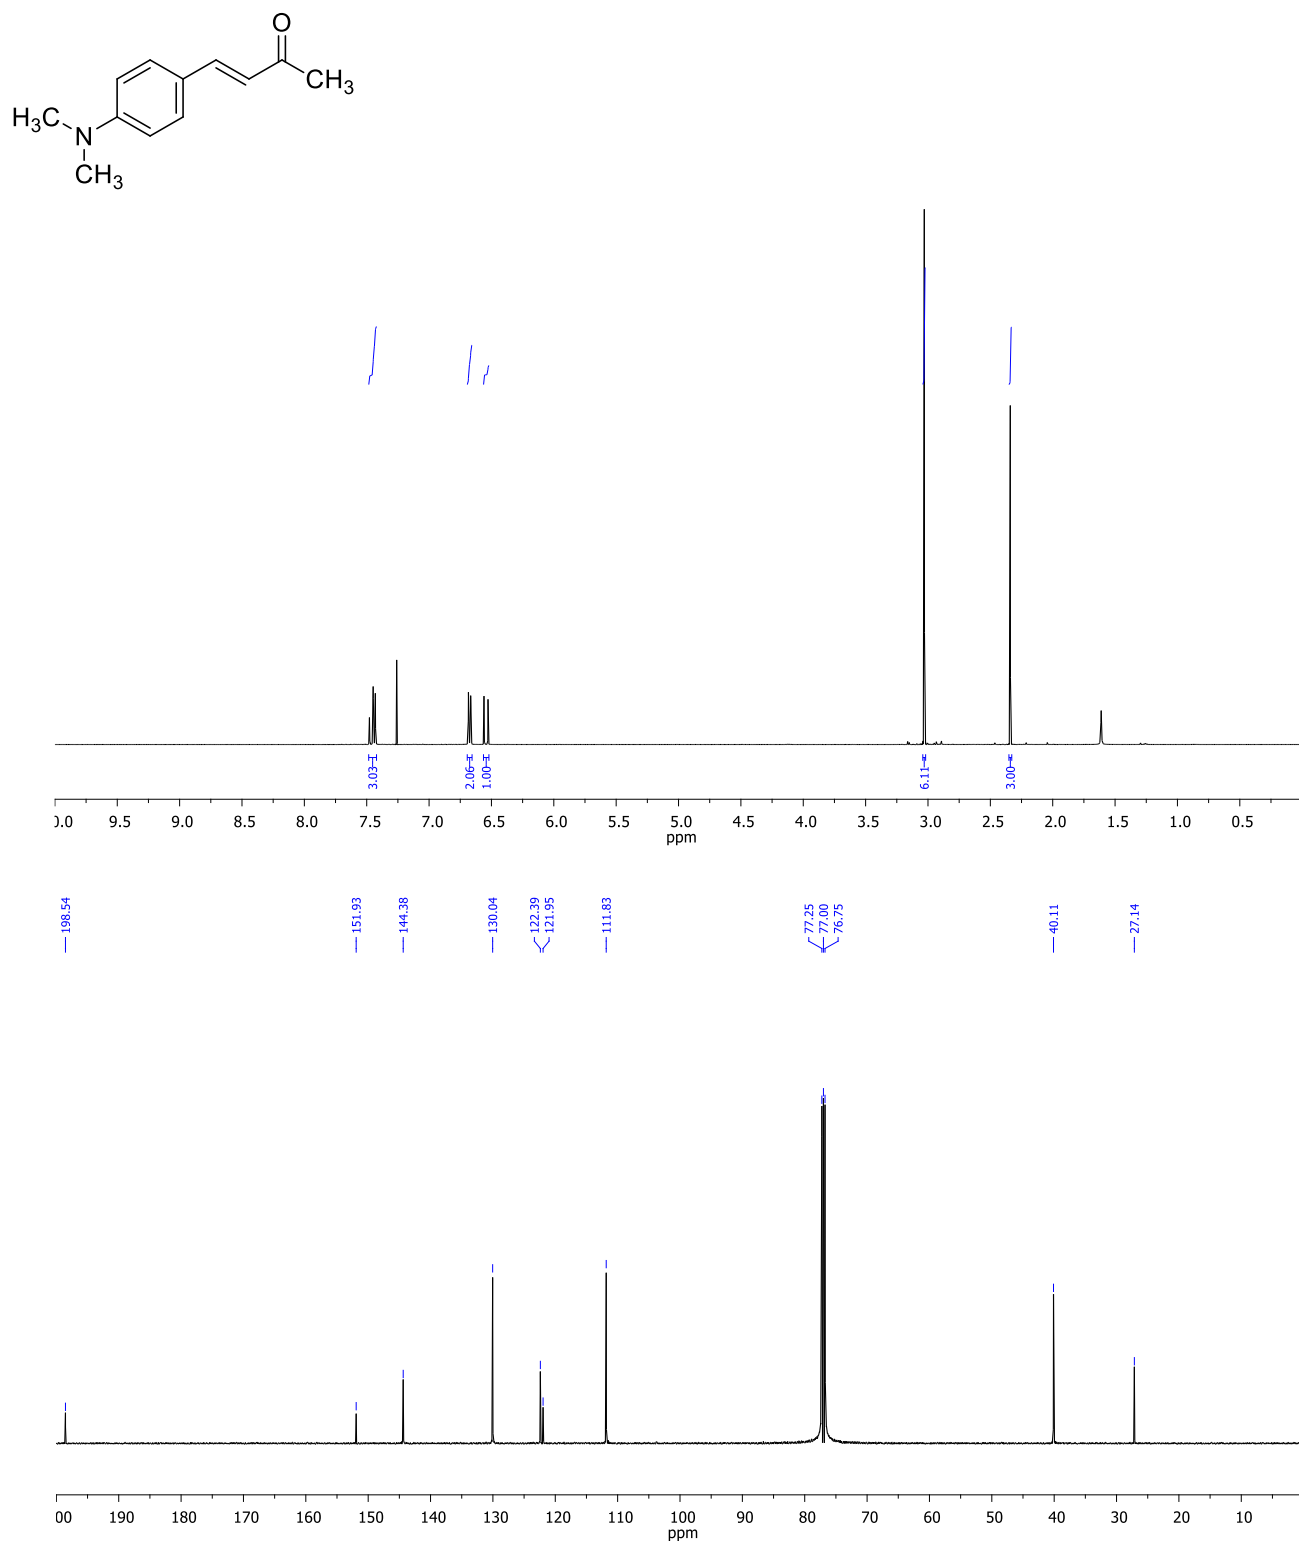

Figure S1.  $^1\text{H}$  NMR and  $^{13}\text{C}$  NMR spectra of compound 52

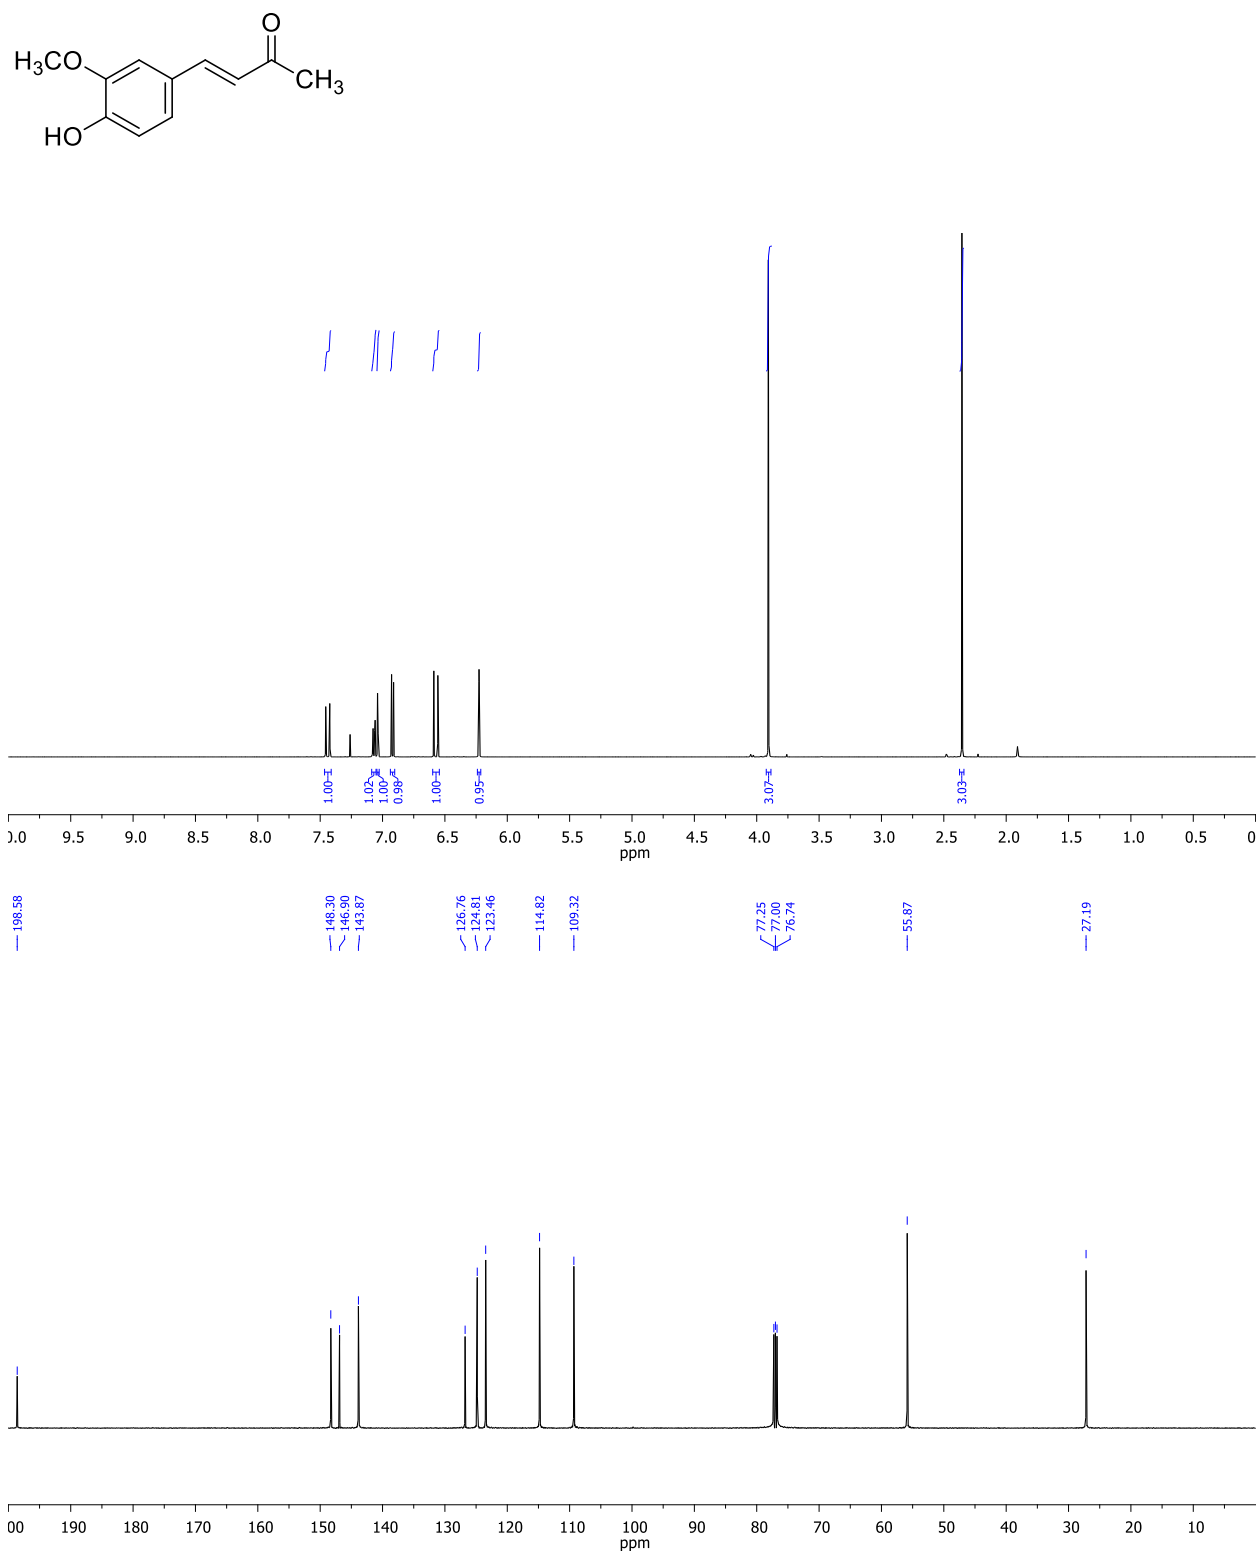

**Figure S2.** <sup>1</sup>H NMR and <sup>13</sup>C NMR spectra of compound **53**

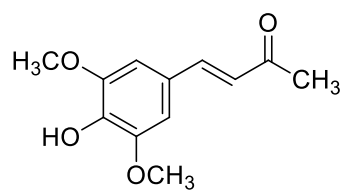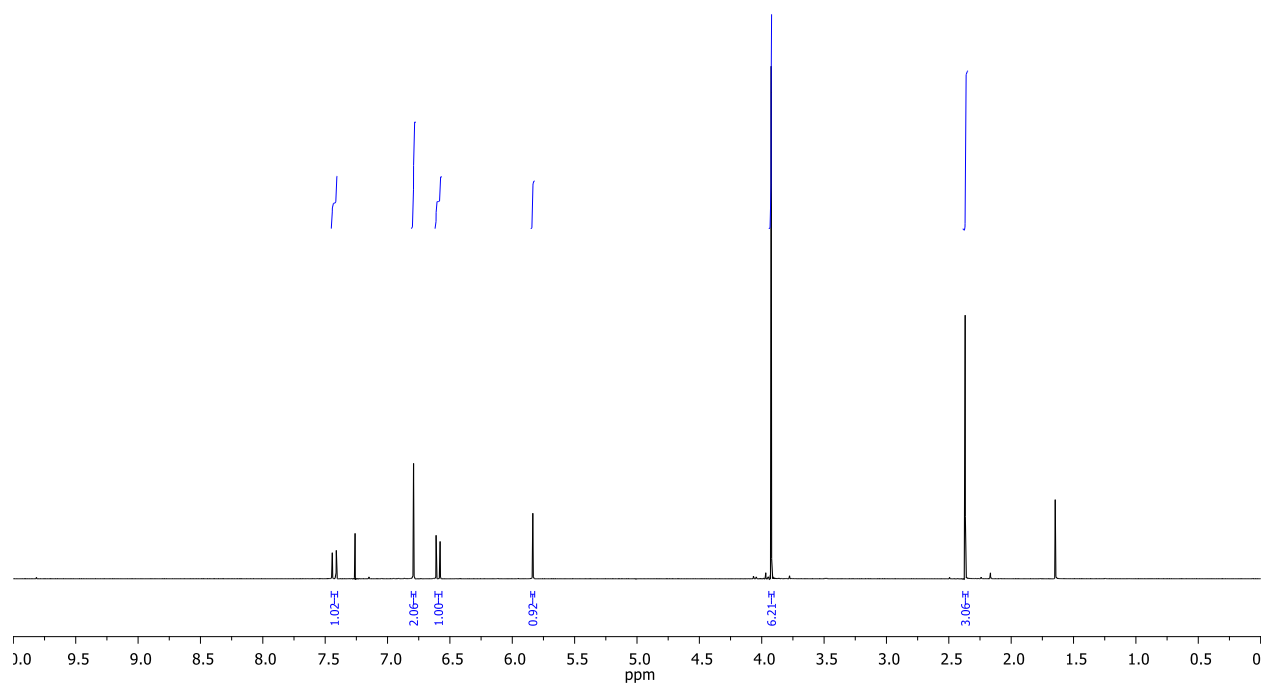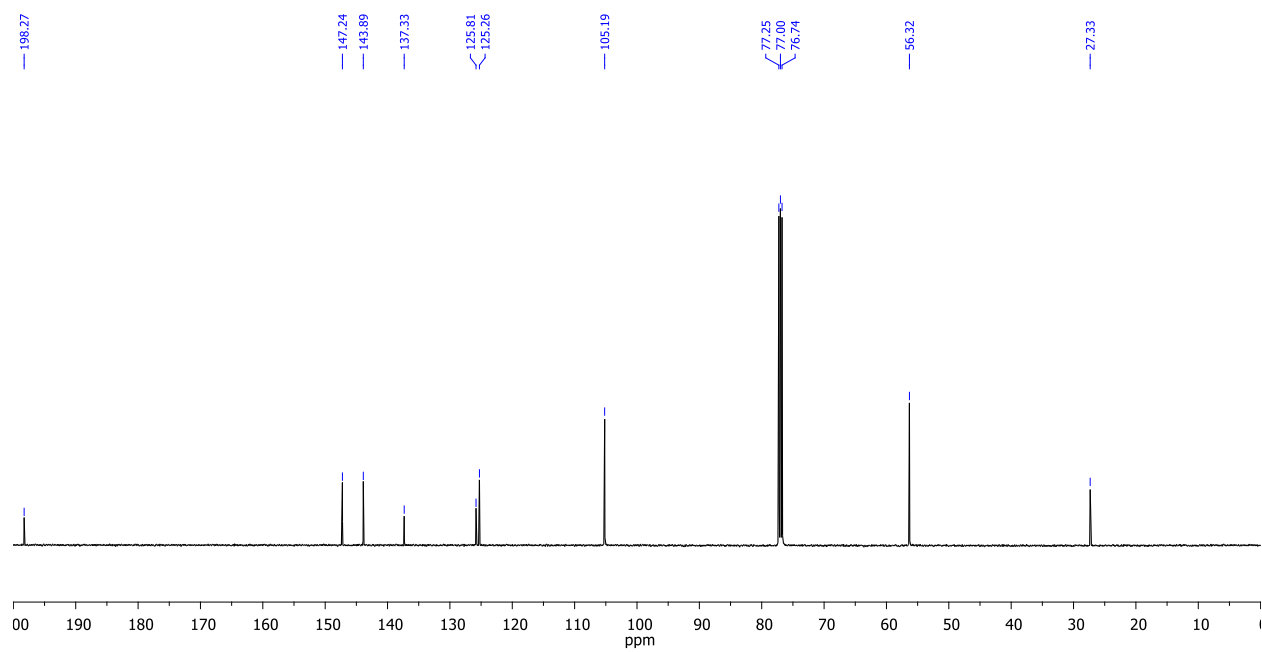

**Figure S3.** <sup>1</sup>H NMR and <sup>13</sup>C NMR spectra of compound 54
